# Supplementary material for: Embedding high-resolution touch across robotic hands enables adaptive human-like grasping
Source: Research Square preprint supplement (doi:10.21203/rs.3.rs-5666566/v1), 2025-01-29
Supplement: Supplementary file 1 [file d63ea76989c2101b66e4e6b0.pdf]

|                                                                                                                                                                 |      |
|-----------------------------------------------------------------------------------------------------------------------------------------------------------------|------|
| <b>Supplementary information</b>                                                                                                                                | 1795 |
|                                                                                                                                                                 | 1796 |
| <b>Embedding high-resolution touch across robotic hands enables adaptive</b>                                                                                    | 1797 |
| <b>human-like grasping</b>                                                                                                                                      | 1798 |
|                                                                                                                                                                 | 1799 |
| Zihang Zhao <sup>1,2†</sup> , Wanlin Li <sup>2†</sup> , Yuyang Li <sup>1,2†</sup> , Tengyu Liu <sup>2†</sup> , Boren Li <sup>2</sup> , Meng Wang <sup>2</sup> , | 1800 |
| Kai Du <sup>1</sup> , Hangxin Liu <sup>2*</sup> , Yixin Zhu <sup>1,3*</sup> , Qining Wang <sup>4</sup> , Kaspar Althoefer <sup>5*</sup> , Song-                 | 1801 |
| Chun Zhu <sup>1,2</sup>                                                                                                                                         | 1802 |
|                                                                                                                                                                 | 1803 |
|                                                                                                                                                                 | 1804 |
| † equal contributors    * corresponding authors                                                                                                                 | 1805 |
|                                                                                                                                                                 | 1806 |
| <sup>1</sup> Institute for Artificial Intelligence, Peking University, Beijing 100871, China                                                                    | 1807 |
|                                                                                                                                                                 | 1808 |
| <sup>2</sup> Beijing Institute for General Artificial Intelligence (BIGAI), Beijing 100080, China                                                               | 1809 |
|                                                                                                                                                                 | 1810 |
| <sup>3</sup> PKU-WUHAN Institute for Artificial Intelligence, Wuhan 430075, China                                                                               | 1811 |
|                                                                                                                                                                 | 1812 |
| <sup>4</sup> College of Engineering, Peking University, Beijing 100871, China                                                                                   | 1813 |
|                                                                                                                                                                 | 1814 |
| <sup>5</sup> School of Engineering and Materials Science, Queen Mary University of London,                                                                      | 1815 |
| London, E1 4NS, UK                                                                                                                                              | 1816 |
|                                                                                                                                                                 | 1817 |
|                                                                                                                                                                 | 1818 |
|                                                                                                                                                                 | 1819 |
|                                                                                                                                                                 | 1820 |
|                                                                                                                                                                 | 1821 |
|                                                                                                                                                                 | 1822 |
|                                                                                                                                                                 | 1823 |
|                                                                                                                                                                 | 1824 |
|                                                                                                                                                                 | 1825 |
|                                                                                                                                                                 | 1826 |
|                                                                                                                                                                 | 1827 |
|                                                                                                                                                                 | 1828 |
|                                                                                                                                                                 | 1829 |
|                                                                                                                                                                 | 1830 |
|                                                                                                                                                                 | 1831 |
|                                                                                                                                                                 | 1832 |
|                                                                                                                                                                 | 1833 |
|                                                                                                                                                                 | 1834 |
|                                                                                                                                                                 | 1835 |
|                                                                                                                                                                 | 1836 |
|                                                                                                                                                                 | 1837 |
|                                                                                                                                                                 | 1838 |
|                                                                                                                                                                 | 1839 |
|                                                                                                                                                                 | 1840 |

## 1841 S1 Details of GelSight-inspired image formation model

1842

### 1843 S1.1 Near-field camera model and calibration

1844

1845 The near-field camera model consists of two main components: camera geometry and  
1846 radiometry. The geometry employs a perspective projection model [51], suitable for the  
1847 compact GelSight-inspired sensors where elastomer deformation is significant relative  
1848 to the camera’s working distance. A 3D surface point,  ${}^{\{C\}}\tilde{\mathbf{X}}$ , is projected to a 2D  
1849 image point,  ${}^{\{P\}}\mathbf{x}$ , using the equation

1850

$$1851 \quad {}^{\{P\}}\mathbf{x} = \frac{1}{{}^{\{C\}}Z} \mathbf{K}^{\{C\}} \tilde{\mathbf{X}}, \quad (\text{S1})$$

1852

1853 where  $\{C\}$  and  $\{P\}$  are the camera and pixel coordinate frames, respectively. The  
1854 camera intrinsics,  $\mathbf{K}$ , determine the unit viewer direction,  $\bar{\mathbf{v}}$ , at each pixel. The world  
1855 coordinate frame,  $\{W\}$ , aligns its XY plane with the elastomer support plane and  
1856 is related to  $\{C\}$  through a 3D rigid transformation, serving as camera extrinsics.  
1857 The camera is calibrated prior to elastomer attachment using Zhang *et al.* [52] to  
1858 correct lens distortions and obtain intrinsics and extrinsics. Given a uniform and known  
1859 elastomer thickness, the contact plane equation is straightforwardly derived.

1860

1861 Assuming vignetting effects are negligible due to the central location of the per-  
1862 ceptible region in the camera’s field of view, the camera radiometry focuses solely on  
1863 photometric response. Fixed white balance gain is set for the color cameras, and each  
1864 color channel,  $\{F_c\}_{c=R,G,B}$ , has its own monotonic photometric response correlating  
1865 image irradiance,  $\{I_c\}_{c=R,G,B}$ , to measured intensity,  $\{M_c\}_{c=R,G,B}$ , as  $M_c = F_c(I_c)$ .  
1866 This response is calibrated using  $\{G_c = F_c^{-1}\}_{c=R,G,B}$ , following Mitsunaga *et al.* [53],  
1867 where  $G_c$  is modeled as a third-order polynomial. Surface radiance,  $\{L_c^{i,j}\}_{c=R,G,B}$ , is  
1868 then derived from measured intensity as  $L_c^{i,j} = G_c(M_c^{i,j})$ , where  $(i,j)$  denotes the  
1869 pixel location.

1870

1871

1872

Given that all compact GelSight-inspired sensors utilize the same camera type, a single calibration suffices for all, with the exception of an additional calibration image required to estimate the extrinsics for each individual sensor.

## S1.2 Ground-truth elastomer surface geometry acquisition

To construct the sensor model, acquiring ground-truth elastomer surface geometry is essential. Direct measurement using high-accuracy devices being impractical, an indirect approach is adopted. The experimental setup employs an XYZ 3-axis linear trimming stage, as depicted in [Figure S1A](#). The sensor is affixed at the stage's bottom, allowing lateral adjustments in the X and Y directions. Assuming ideal manufacturing, the stage's XY plane is parallel to the sensor contact plane. A 3D-printed cube probe is mounted upside down at the top, perpendicular to the sensor contact plane. The stage coordinate frame,  $\{S\}$ , aligns its XY plane with the mount's flat base and its Z-axis perpendicular to the sensor contact plane. The  $\{S\}Z = 0$  is set by lowering the cube probe until just before contact. The cube probe's position is adjusted to appear near the perceptible region's center. The 3D transformation from  $\{S\}$  to  $\{C\}$  is calibrated using a perspective-n-point problem [54], involving camera intrinsics and 3D corner points of the cube probe. Calibration performance is assessed by reprojection error, as shown in [Figure S1A](#).

Upon calibrating the stage, the cube probe can be substituted with any 3D-printed object of known geometry. A depth map is generated using the calibrated camera's visibility constraint. Only pixels with depth within the elastomer thickness range are preserved in the contact area, while the contact-free area is filled using the contact plane's depth map. Thus, by mounting various objects and adjusting the calibrated stage, per-pixel elastomer surface geometry is obtained as ground truth.

### 1933 S1.3 Near-field lighting model and calibration

1934

1935 The near-field lighting model comprises lighting geometry and radiometry. In the  
1936 compact GelSight-inspired sensors, the geometry involves multiple LEDs illuminating  
1937 the surface from various positions. Given their small size relative to working distance,  
1938 LEDs are modeled as point sources. Their positions are denoted as  $\{\{^C\}\tilde{\mathbf{s}}_k\}_{k \in [1, N]}$ ,  
1939 where  $N$  is the LED count for a sensor. For each  $k^{th}$  LED, the unit light direction,  
1940  $\bar{\mathbf{s}}_k$ , and light-surface distance,  $\|\mathbf{s}_k\|$ , are determined. A 3D-printed calibration object  
1941 with two cylindrical sundials on a square mount's diagonal is used for light position  
1942 estimation. The object is carefully pressed onto the elastomer using the calibrated XYZ  
1943 stage. Individual LEDs are activated sequentially, and their positions are estimated  
1944 using shadow cues [55] and triangulation.

1945 Lighting radiometry accounts for the spatial distribution of emitted energy reaching  
1946 the surface. It is influenced by the LED's radiation pattern and its distance to the  
1947 surface point. For the chosen LEDs with symmetrical radiation patterns, the radiometry  
1948 is characterized by

$$1949 \kappa_k^{i,j} = \eta_k \left( \left( -\bar{\mathbf{s}}_k^{i,j} \right)^\top \bar{\mathbf{p}}_k \right)^{\mu_k} / \|\mathbf{s}_k^{i,j}\|^2, \quad (S2)$$

1950 where  $\bar{\mathbf{p}}_k$  is the principal light direction for the  $k^{th}$  LED. Parameters  $\eta_k$ ,  $\mu_k$ , and  $\bar{\mathbf{p}}_k$   
1951 are calibrated jointly with reflectance parameters.

1952

1953

### 1954 S1.4 Reflectance model and calibration

1955

1956 The reflectance model for our compact GelSight-inspired sensors is based on the  
1957 elastomer material's reflectance property. Although the elastomer is theoretically near-  
1958 Lambertian, its appearance in camera images is flatter, which we attribute to surface  
1959 roughness. To address this, we adopt the generalized Lambertian model [56]. The

1960

1961

1962

1963

1964

1965

1966

1967

1968

1969

1970

1971

1972

1973

1974

1975

1976

1977

1978

surface radiance under specific lighting conditions is modeled as

$$\begin{cases} L_c^{i,j} \left( \theta_r^{i,j}, \theta_i^{i,j}, \phi_r^{i,j} - \phi_i^{i,j}; \rho_c, \sigma \right) = \kappa^{i,j} \frac{\rho_c}{\pi} \max \left[ 0, \cos \theta_i^{i,j} \right] f_r^{i,j} \\ f_r^{i,j} = A + B \max \left[ 0, \cos \left( \phi_r^{i,j} - \phi_i^{i,j} \right) \right] \sin \alpha^{i,j} \tan \beta^{i,j} \\ A = 1.0 - 0.5 \frac{\sigma^2}{\sigma^2 + 0.33} \\ B = 0.45 \frac{\sigma^2}{\sigma^2 + 0.09} \end{cases}, \quad (\text{S3})$$

where  $(\theta_i^{i,j}, \phi_i^{i,j})$  and  $(\theta_r^{i,j}, \phi_r^{i,j})$  are the light and viewer directions in a local coordinate frame. Additional parameters include  $\alpha^{i,j}$ ,  $\beta^{i,j}$ ,  $\sigma$ , and  $\{\rho_c\}_{c=R,G,B}$ .

For calibration, a 3D-printed sphere with a 3 mm diameter is pressed at  $Q$  different locations onto the elastomer surface using a calibrated XYZ stage. At each press,  $N$  images are captured, each with a single LED lit. The calibration aims to solve the following constrained nonlinear fitting problem:

$$\begin{aligned} \min_{\eta_k, \mu_k, \bar{\mathbf{p}}_k, \sigma, \rho_c} & \sum_{q=1}^Q \sum_{k=1}^N \sum_{c=1}^3 \sum_{i=1}^H \sum_{j=1}^W \left[ G_c \left( M_{c,k,q}^{i,j*} \right) - \kappa_k^{i,j} \frac{\rho_c}{\pi} \cos \theta_i^{i,j} f_r^{i,j} \right]^2 + \lambda \sum_{k=1}^N (\eta_k - 1)^2 \\ & i, j \in \mathcal{I}_k \cap \mathcal{S} \\ \text{s.t.} & \|\bar{\mathbf{p}}_k\| = 1 \\ & \mu_k \geq 0 \\ & \sigma \geq 0 \end{aligned} \quad (\text{S4})$$

where  $H$  and  $W$  are the height and width of the image sensor in pixels.  $\mathcal{I}_k$  is the non-shadow area of the  $k^{th}$  image, and  $\mathcal{S}$  is the perceptible region of GelSight-inspired within the camera's field of view. The asterisk denotes measurement throughout the paper. The first term in the equation is for least-square fitting, while the second term is for regularization. Due to the problem's high nonlinearity, careful initialization is required.  $\bar{\mathbf{p}}_k$  is initialized to point towards the center of the perceptible region,  $\mu_k$

is initialized to 1.2,  $\eta_k$  and  $\rho_c$  are initialized to 1, and  $\sigma$  is initialized to 0.2. The problem is solved using the Levenburg-Marquardt algorithm. Calibration performance is evaluated using a test image not seen during fitting, with the error converging at 4 presses, as shown in Figure S1B. This implies that only 4 N calibration images are needed for accurate parameter estimation. Since the sensors share the same type of LEDs and elastomer material, calibration is required only once.

Finally, with all LEDs turned on, the overall surface radiance,  $\widehat{L}_c^{i,j}$ , is given by

$$\widehat{L}_c^{i,j} = \sum_{k=1}^N L_{c,k}^{i,j}. \quad (\text{S5})$$

## S1.5 Cast shadow model

In addition to the pixel-wise shading model, global effects like inter-reflection and cast shadow also influence pixel intensities in tactile images. Inter-reflection is negligible due to the black low-albedo matte material of the sensor’s cover. For cast shadows, given the known calibrated point light positions and surface geometry, we compute the shadow for each light using the canonical hidden point removal operator [57] to mask the shadow-casting areas.

## S1.6 Soft elastomer deformation model

The contact-free elastomer is assumed to have a 3D geometry parallel to the reference plane. Given the camera extrinsics and elastomer thickness, the contact plane equation in  $\{C\}$  is determined. When an object contacts the elastomer, its depth map is computed using camera visibility constraints, object mesh, and 6D pose. Only pixels within the elastomer thickness range are preserved in the contact area. The non-contact area is filled with the depth map of the contact-free elastomer. Due to the material’s softness, the elastomer deforms into a smoothed shape of the contacting object. We apply a simple soft body simulation approximation, smoothing the depth map boundaries

between contact and non-contact areas using pyramid Gaussian kernels [58]. Finally, pixel values in non-contact and non-shadow areas are replaced by their counterparts in a background image captured without elastomer deformation.

### S1.7 Sensor simulator evaluation

We evaluate the sensor simulator by comparing its outputs to real sensor data, using the setup shown in Figure S1A. We 3D print 20 objects from the tactile shape dataset [59], excluding the *Cone* to prevent sensor damage. For each object, we collect multiple sensor outputs under varying conditions, resulting in a dataset of 140 real images.

We employ three metrics for comparison: mean absolute error (L1), structural index similarity (SSIM), and peak signal-to-noise ratio (PSNR). Qualitative and quantitative comparisons are presented in Figure S1C and Table S1, respectively. The simulator excels in structural accuracy (SSIM) due to our geometrical calibration method and also accurately replicates image intensity (L1 and PSNR) through lighting radiometry and reflectance calibration. The simulated and real cast shadow regions align well, confirming the effectiveness of our light position calibration.

Our physics-based sensor model and calibration techniques enable the simulator to generate accurate sensor outputs at scale. This eliminates the need for extensive data acquisition for each sensor on F-TAC Hand. The calibrated parameters can be reused as the hardware components are shared, simplifying the calibration process for all sensors on F-TAC Hand.

## 2117 **S2 Details of DPS**

2118

### 2119 **S2.1 Training details**

2120

2121 We implemented the deep PS network using PyTorch and employed additive white  
2122 Gaussian noise (standard deviation 0.01) for data augmentation. The network was  
2123 trained using the Adam optimizer with  $\beta_1 = 0.9$  and  $\beta_2 = 0.999$ , a batch size of 128,  
2124 and an initial learning rate of 0.01. The learning rate was halved every five epochs. The  
2125 training was conducted on a single NVIDIA RTX 3090 GPU and took approximately  
2126 six hours to converge.

2127

2128

### 2129 **S2.2 Evaluator**

2130

2131 We evaluate the trained deep PS network using an unobserved dataset of four shapes  
2132 with 46,656 samples. The mean angular error (MAE) serves as the evaluation metric.

2133

2134

2135

2136

2137

2138

2139

2140

2141

2142

2143

2144

2145

2146

2147

2148

2149

2150

2151

2152

2153

2154

2155

2156

2157

2158

2159

2160

2161

2162



### S3 Differentiable force closure estimator

Determining force-closure grasps under kinematic constraints is computationally expensive in our context. To mitigate this, we introduce a quick, differentiable force closure estimator, facilitating efficient grasp generation. Computational time benchmarks can be found in Supplementary Information S6.

For a grasp with a set of  $n$  contact points  $\{x_i \in \mathbb{R}^3, i = 1, \dots, n\}$ , it is in force closure if for any external wrench  $\omega$ , there exists a combination of contact forces  $\{f_i \in \mathbb{R}^3\}$  that can resist  $\omega$ . Specifically, the  $i$ -th contact force  $f_i$  should lie within the friction cone at the  $i$ -th contact point  $x_i$ . Formally, a grasp is in force closure if it satisfies the following constraints:

$$GG' \succeq \epsilon I_{6 \times 6}, \quad (\text{S6a})$$

$$Gf = 0, \quad (\text{S6b})$$

$$f_i^T c_i > \frac{1}{\sqrt{\mu^2 + 1}} |f_i|, \quad (\text{S6c})$$

$$x_i \in S(O), \quad (\text{S6d})$$

where  $S(O)$  is the object surface,  $c_i$  the friction cone axis at  $x_i$ ,  $\mu$  the friction coefficient,  $f = [f_1^T f_2^T \dots f_n^T]^T \in \mathbb{R}^{3n}$  the unknown variable of contact forces, and

$$G = \begin{bmatrix} I_{3 \times 3} & I_{3 \times 3} & \dots & I_{3 \times 3} \\ [x_1]_{\times} & [x_2]_{\times} & \dots & [x_n]_{\times} \end{bmatrix}, \quad (\text{S7})$$

$$[x_i]_{\times} = \begin{bmatrix} 0 & -x_i^{(3)} & x_i^{(2)} \\ x_i^{(3)} & 0 & -x_i^{(1)} \\ -x_i^{(2)} & x_i^{(1)} & 0 \end{bmatrix}. \quad (\text{S8})$$

2209 Here, the form of  $\lfloor x_i \rfloor_{\times}$  ensures  $\lfloor x_i \rfloor_{\times} f_i = x_i \times f_i$ . In Equation (S6a),  $\epsilon$  is a small  
 2210 constant and  $A \succeq B$  indicates  $A - B$  is positive semi-definite. Equation (S6a) asserts  
 2211 that  $G$  is full-rank; Equation (S6b) asserts that contact forces balance each other;  
 2212 Equation (S6c) asserts that  $f_i$  stays within its friction cone; and Equation (S6d) asserts  
 2213 that contact points lie on the object surface.

2217 To satisfy these constraints, one must solve for  $\{f_i\}$  that meet Equations (S6b)  
 2218 and (S6c), a time-consuming process. To expedite this, we simplify these equations into:

$$2222 \quad Gf = G(f^n + f^t) = 0, \quad (S9a)$$

$$2224 \quad G \frac{f^n}{\|f^n\|_2} = -\frac{Gf^t}{\|f^n\|_2}, \quad (S9b)$$

$$2226 \quad Gc = -\frac{Gf^t}{\|f^n\|_2}, \quad (S9c)$$

2230 where  $f^n$  and  $f^t$  represent the normal and tangential components of  $f$ , and  $c =$   
 2231  $[c_1^T c_2^T \dots c_n^T]^T$  represents friction cone axes. We approximate  $Gf$  with  $Gc$ , which consists  
 2232 of object surface normals at each  $x_i$ . This simplifies Equation (S6) into:

$$2236 \quad GG' \succeq \epsilon I_{6 \times 6}, \quad (S10a)$$

$$2238 \quad \|Gc\|_2 < \delta, \quad (S10b)$$

$$2240 \quad x_i \in S(O), \quad (S10c)$$

2244 where  $\delta$  is the maximum allowed error due to our relaxation. Using Equation (S10),  
 2245 solving for  $f$  becomes unnecessary. The constraints for  $x_i$  turn quadratic, significantly  
 2246 accelerating force-closure verification. The residual  $\|Gc\|_2$  accounts for discrepancies  
 2247 between contact forces and friction cone axes.

We further rewrite Equation (S10) as soft constraints for gradient-based optimization:

$$FC(x, O) = \lambda_0(GG' - \epsilon I_{6 \times 6}) + \|Gc\|_2 + w \sum_{x_i \in x} \max(d_O^{\text{SDF}}(x_i), 0), \quad (\text{S11})$$

where  $\lambda_0(\cdot)$  gives the smallest eigenvalue, and  $d_O^{\text{SDF}}(x)$  is the SDF from point  $x$  to the object  $O$ , consistent with its definition in Equation (4). By minimizing  $FC(x, O)$ , we can find the contact points  $x = \{x_i\}$  that make contact with the object while providing force-closure support on it, satisfying the constraints in Equation (S10).

## 2301 S4 Grasp classification

2302  
2303 To showcase the diversity of grasps generated by our system, we synthesize a total of  
2304 3,450 grasps, comprising 150 grasps with 2-5 contact points for each of the 23 objects  
2305 in our study. These grasps are then categorized into 19 distinct types based on the  
2306 grasp taxonomy proposed by Feix *et al.* [23]. Due to the motion limitations of F-TAC  
2307 Hand, we make some simplifications and merge similar grasp types that share the same  
2308 opposition type and thumb position. For example, we combine *Prismatic 2-Finger*,  
2309 *Prismatic 3-Finger*, and *Prismatic 4-Finger* into a single category, as they differ only  
2310 in the number of fingers involved. The resulting 19 types are detailed in [Table S2](#).

2311  
2312 To ensure high-quality annotations, we enlist human annotators to label each grasp.  
2313 Instead of providing a single image, we present them with an interactive HTML file  
2314 that contains various grasp-related details, such as the F-TAC Hand configuration,  
2315 object mesh, and contact areas. This interactive approach allows annotators to view  
2316 the grasp from multiple perspectives and adjust the visibility of different elements,  
2317 providing a more comprehensive understanding. Examples of this interactive process  
2318 are visualized in [Figure S2](#).

2319  
2320 Given the subtle differences among the 19 grasp types, we adopt a two-step  
2321 annotation process. Initially, annotators are asked to categorize the grasp into one  
2322 of the three broad types (*Power*, *Precision*, *Intermediate*) based on the definitions  
2323 in Feix’s taxonomy [23]. They then proceed to identify the specific type from the 19  
2324 available options, considering factors such as the number of contact areas and the  
2325 visual similarity to examples provided in Feix *et al.* [23].

2326  
2327  
2328  
2329  
2330  
2331  
2332  
2333  
2334  
2335  
2336  
2337  
2338  
2339  
2340  
2341  
2342  
2343  
2344  
2345  
2346

## S5 2D cluster map for generated grasps

The 2D map illustrated in [Extended Data Fig. 4](#) shows the human-like characteristics of the grasp synthesis algorithm. To plot this map, we adopt contact map [38, 60] and compute it over the hand surface to represent hand-object contact across different object geometries. The hand contact map  $\Omega$ , defined over the hand surface  $\mathcal{S}(H)$ , is computed as the distance from the hand  $H$  to the object  $O$ :

$$\Omega = \log(\epsilon_1 + \min(\mathbf{D}(H, O), \epsilon_2)), \quad (\text{S12})$$

where

$$\mathbf{D}(x_h, O) = \min_{x_o \in \mathcal{S}(O)} \|x_h - x_o\|_2. \quad (\text{S13})$$

The distance function  $\mathbf{D}$  measures the Euclidean distance (in meters) from any point on the hand surface  $x_h \in \mathcal{S}(H)$  to the object surface  $\mathcal{S}(O)$ . To improve sensitivity in regions of close contact for better classification, we apply the log function to curve the distance. A small  $\epsilon_1 > 0$  is used to maintain the appropriate value range for the log function. As grasping only concerns nearby areas of the object, we introduce  $\epsilon_2 > 0$  to truncate the distance, mitigating the influence of distant areas not in contact.

In practice, the contact map is approximated with a dense point cloud with 2,170 points enveloping the hand surface. The parameters  $\epsilon_1 = 0.0001, \epsilon_2 = 0.05$  are empirically chosen. Given its high dimensionality, this map is subsequently condensed to 6-dimensional space with PCA after normalization, and visualized on a 2D surface with t-SNE. For clarity, [Extended Data Fig. 4](#) only consists of 1000 grasps, sampled using Furthest Point Sampling (FPS) on the Euclidean distance of the contact maps, from all the generated grasps. The decision boundary is also determined by a SVC with the RBF kernel using the sample points for *Power* grasps and *Precision grasps*, achieving an 81.54 % classification accuracy.

## 2393 S6 Quantitative analysis of grasp generation algorithm

2394

2395 Our proposed algorithm efficiently estimates force closure errors using [Equation \(S11\)](#),  
2396  
2397 addressing the most time-consuming aspect of traditional grasp generation methods [[61](#)–  
2398  
2399 [65](#)]. We validate its efficiency by running experiments on an Intel Xeon CPU (2.90 GHz)  
2400 coupled with a single NVIDIA RTX 3090 GPU. Various combinations of contact points  
2401 and parallel instances are tested, and the results are shown in [Figure S3A](#). Notably,  
2402 even the most complex scenario involving 64 contact points across 64 parallel instances  
2403 takes under 2 ms per test.  
2404  
2405

2406 For gradient-based methods, navigating a complex, non-convex energy landscape  
2407 without getting stuck in local minima is a significant challenge. Our method addresses  
2408 this issue effectively through MALA. We demonstrate this by running 512 grasp  
2409 generation instances for grasping a ball on the same hardware setup. The results,  
2410 presented in [Figure S3B](#), reveal that the entire process takes just 754.61 s and yields  
2411 287 successful grasps, achieving a 56 % success rate. This efficiency in generating a  
2412 diverse set of grasps is a direct result of our approach.  
2413  
2414  
2415  
2416  
2417  
2418  
2419  
2420  
2421  
2422  
2423  
2424  
2425  
2426  
2427  
2428  
2429  
2430  
2431  
2432  
2433  
2434  
2435  
2436  
2437  
2438

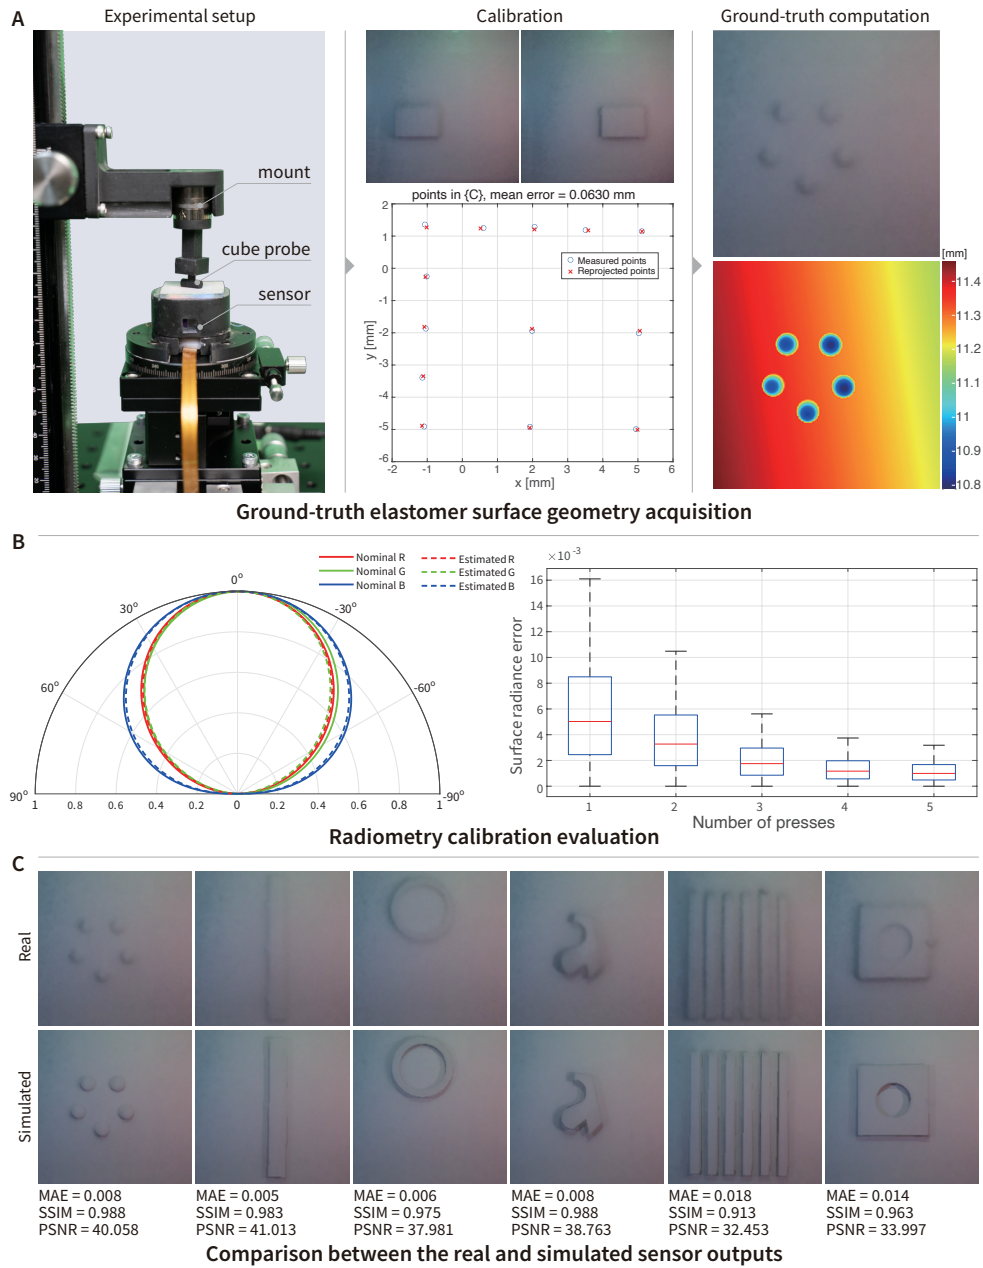

**Fig. S1 Sensor calibration and simulation.** (A) Setup for obtaining ground-truth elastomer surface geometry. (B) Calibrated light radial attenuation pattern versus nominal values, evaluated by surface radiance error across different press counts. (C) Real versus simulated sensor outputs with similarity scores indicated.

2485  
2486  
2487  
2488  
2489  
2490  
2491  
2492  
2493  
2494  
2495  
2496  
2497  
2498  
2499  
2500  
2501  
2502  
2503  
2504  
2505  
2506  
2507  
2508  
2509  
2510  
2511  
2512  
2513  
2514  
2515  
2516  
2517  
2518  
2519  
2520  
2521  
2522  
2523  
2524  
2525  
2526  
2527  
2528  
2529  
2530

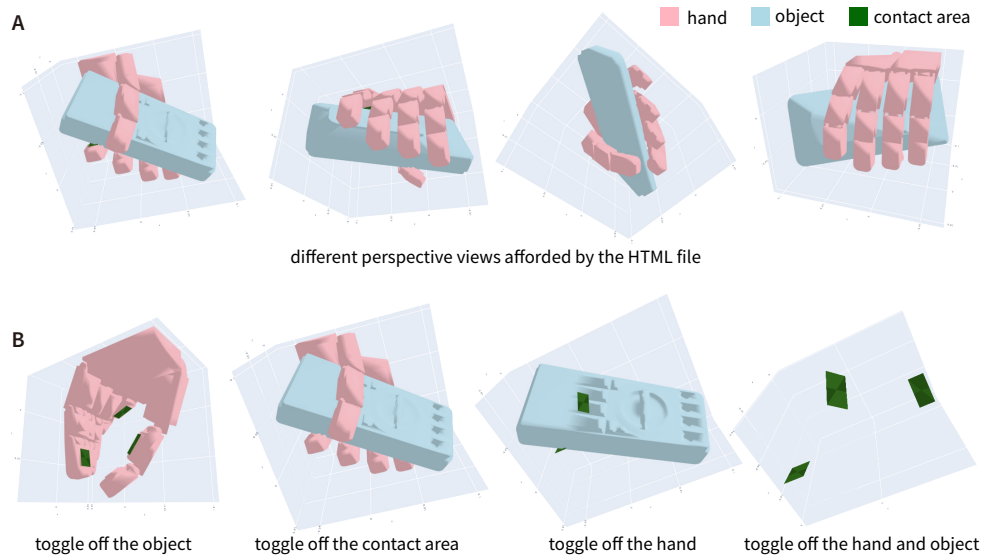

**Fig. S2 Flexible interaction for high-quality annotation:** Screenshots from an HTML file displaying all grasp-related details. The F-TAC Hand is shown in pink, the object (multimeter) in blue, and contact areas in green. **(A)** Annotators can rotate the view for different perspectives. **(B)** Visibility of grasp elements can be toggled for clearer visualization. The annotation for this example is *Extension Type*.



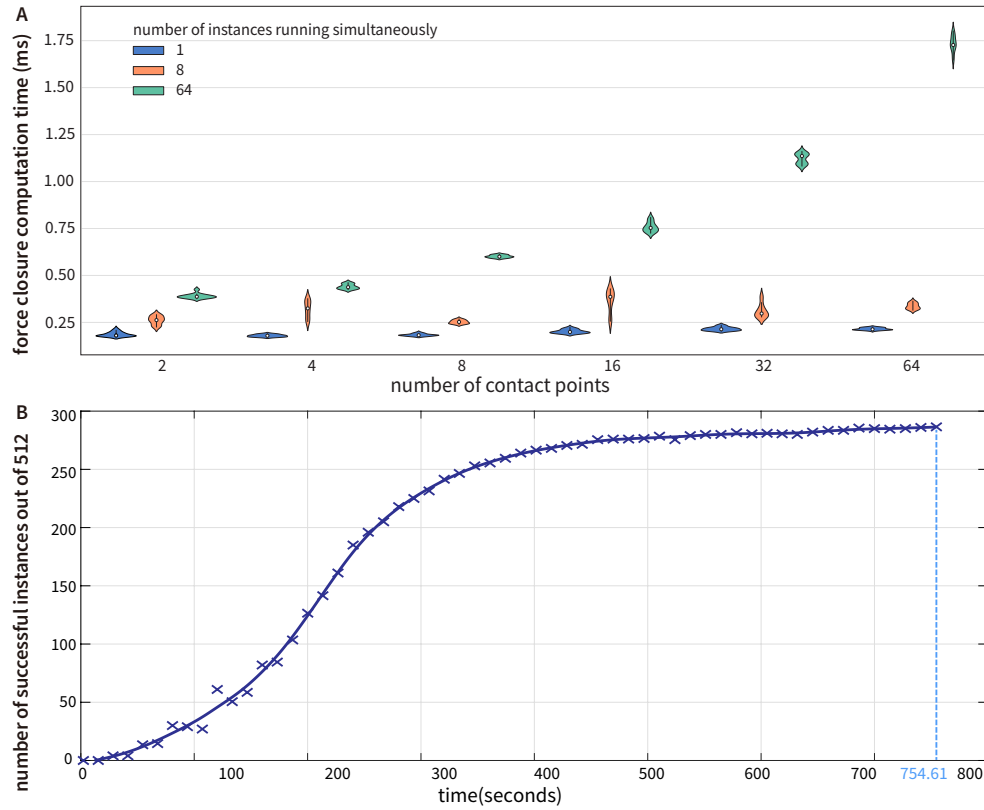

**Fig. S3 Efficient grasp repertoire generation.** (A) Our method rapidly estimates force closure errors using Equation (S11). Even with 64 contact points across 64 parallel instances, each test takes under 2 ms. (B) Utilizing MALA, the algorithm navigates the complex energy landscape efficiently. In a test with 512 parallel instances for grasping a ball, the entire process takes just 754.61 s, yielding 287 successful grasps at a 56 % success rate.

2577  
 2578  
 2579  
 2580  
 2581  
 2582  
 2583  
 2584  
 2585  
 2586  
 2587  
 2588  
 2589  
 2590  
 2591  
 2592  
 2593  
 2594  
 2595  
 2596  
 2597  
 2598  
 2599  
 2600  
 2601  
 2602  
 2603  
 2604  
 2605  
 2606  
 2607  
 2608  
 2609  
 2610  
 2611  
 2612  
 2613  
 2614  
 2615  
 2616  
 2617  
 2618  
 2619  
 2620  
 2621  
 2622

**Table S1** Quantitative similarity comparison between the real and the simulated sensor outputs.

| <b>L1</b>         | <b>SSIM</b>       | <b>PSNR</b>        |
|-------------------|-------------------|--------------------|
| $0.009 \pm 0.003$ | $0.976 \pm 0.008$ | $38.808 \pm 1.236$ |

**Table S2** The 19 distinct grasping poses utilized in our classification scheme.

| Grasp Type                    | Included Types in [23]                                            | Type         |
|-------------------------------|-------------------------------------------------------------------|--------------|
| <i>Adducted Thumb</i>         | <i>Adducted Thumb, Light Tool</i>                                 | Power        |
| <i>Fixed Hook</i>             | <i>Fixed Hook</i>                                                 | Power        |
| <i>Index Finger Extension</i> | <i>Index Finger Extension</i>                                     | Power        |
| <i>Ring</i>                   | <i>Ring</i>                                                       | Power        |
| <i>Power Disk</i>             | <i>Power Disk</i>                                                 | Power        |
| <i>Extension Type</i>         | <i>Extension Type</i>                                             | Power        |
| <i>Palmar</i>                 | <i>Palmar</i>                                                     | Power        |
| <i>Heavy Wrap</i>             | <i>Large Diameter, Small Diameter, Medium Wrap</i>                | Power        |
| <i>Power Sphere</i>           | <i>Sphere 3-Finger, Sphere 4-Finger, Power Sphere</i>             | Power        |
| <i>Distal Type</i>            | <i>Distal Type</i>                                                | Power        |
| <i>Stick</i>                  | <i>Stick, Ventral</i>                                             | Intermediate |
| <i>Lateral</i>                | <i>Lateral</i>                                                    | Intermediate |
| <i>Lateral Tripod</i>         | <i>Lateral Tripod</i>                                             | Intermediate |
| <i>Prismatic</i>              | <i>Prismatic 2-Finger, Prismatic 3-Finger, Prismatic 4-Finger</i> | Precision    |
| <i>Writing Tripod</i>         | <i>Writing Tripod</i>                                             | Precision    |
| <i>Precision Disk</i>         | <i>Precision Disk</i>                                             | Precision    |
| <i>Pincer</i>                 | <i>Palmar Pinch, Tip Pinch, Inferior Pincer</i>                   | Precision    |
| <i>Precision Sphere</i>       | <i>Tripod, Quadpod, Precision Sphere</i>                          | Precision    |
| <i>Parallel Extension</i>     | <i>Parallel Extension</i>                                         | Precision    |
